# Supplementary material
Source: publisher figshare collection journal article supplement (https://karger.figshare.com/articles/dataset/_/12022737)
Supplement: Supplementary file 1 [file 1 › 506825_sm1.docx]

**Supplemental Material**

**Safety and efficacy of prasugrel in elderly/low body weight Japanese patients with ischemic stroke: randomized PRASTRO-II**

Kazuo Kitagawa, MD, Kazunori Toyoda, MD, Takanari Kitazono, MD, Masakatsu Nishikawa, MD, Shinsuke Nanto, MD, Yasuo Ikeda, MD, Kenji Abe, MS Akira Ogawa, MD

**PRASTRO-II Trial Committee**

Principal Investigators: Akira Ogawa, MD (Iwate Medical University) and Yasuo Ikeda, MD (Waseda University Faculty of Science and Engineering). Efficacy event evaluation committee: Kazuo Kitagawa, MD (Tokyo Women's Medical University School of Medicine), Takanari Kitazono, MD (Kyushu University), and Shinsuke Nanto, MD (Nishinomiya Municipal Central Hospital). Bleeding event evaluation committee: Masakatsu Nishikawa, MD (Mie University Hospital), and Kazunori Toyoda, MD (National Cerebral and Cardiovascular Center). Pharmacodynamic Advisor: Yukio Ozaki , MD (Fuefuki Central Hospital).

**List of Participating Investigators**

Kouji Itamoto (Teine Keijinkai Hospital), Kenichi Kosaka (Kitahirosima Hospital), Kei Chiba (Chitose Houyukai Hospital), Mitsuru Nunomura (Teine Neurosurgical Clinic), Yusuke Nakagaki (Takikawa Neurosurgical Hospital), Yoshio Okada (Toyooka Chuo Hospital), Takeshi Aoki (Hokkaido Neurosurgical Memorial Hospital), Akira Takahashi (Sapporo Shiroishi Memorial Hospital), Shinsuke Irie (Kojinkai Social Medical Corporation Kojinkai Neurosurgery), Hiroshi Uenohara (National Hospital Organization Sendai Medical Center), Mikio Suzuki (Sendai East Neurosurgical Hospital), Eisuke Furui (Kohnan Hospital), Shinjiro Saito (Yamagata City Hospital Saiseikan), Hiroyuki Tomimitsu (JA Toride Medical Center), Keishi Fujita (Ibaraki Seinan Medical Center Hospital), Takao Kanzawa (Institute of Brain and Blood Vessels Mihara Memorial Hospital), Masahiro Matsumoto (Tatebayashi Kosei Hospital), Masaki Miyatake (Japanese Red Cross Society Azumino Hospital), Takayuki Kuroyanagi (Komoro Kosei General Hospital), Yasuyuki Toba (Kobayashi Neurosurgical Neurological Hospital), Naomichi Wada (Suwa Red Cross Hospital), Atsushi Sato (Ina Central Hospital), Chikashi Maruki (Koshigaya Municipal Hospital), Tsuneaki Ogiichi (Saitama Sekishinkai Hospital; Sayama General Clinic), Sumio Suda (Kimitsu Chuo Hospital), Motoki Sano (Chiba-nishi General Hospital), Hideki Koyama (Fussa Hospital), Yoshiyuki Tomita (Medical Cooperation Shoikai Kasai Shoikai Hospital), Kazuo Koyama (Fujisawa City Hospital), Toshihiko Ohashi (Seirei Hamamatsu General Hospital), Katsunobu Takenaka (Japanese Red Cross Takayama Hospital), Yasuhiko Kaku (Murakami Memorial Hospital Asahi University), Kiyonobu Ikeda (National Hospital Organization Kanazawa Medical Center), Shinya Kida (Fukui Prefectural Hospital), Eiichi Uno (Fukuiken Saiseikai Hospital), Tetsuro Tsuji (Fukui General Clinic), Toshihiko Suenaga (Tenri Hospital), Takashi Naka (Higashiosaka City General Hospital), Shusuke Moriuchi (Rinku General Medical Center), Makoto Izuta (Kishiwada Tokushukai Hospital), Shinichiro Kurokawa (Ishinkai Sogo Clinics), Hidemitsu Nakagawa (Nozaki Tokushukai Hospital), Hisahiko Suzuki (Shinsuma General Hospital), Kazushi Matsushima (Toyooka Hospital), Hideo Terasawa (Hyogo Brain and Heart Center), Hiroji Miyake (Nishinomiya Kyouritsu Neurosurgical Hospital), Nobuyuki Sakai (Kobe City Medical Center General Hospital), Hideyuki Ohnishi (Ohnishi Neurological Center), Satoru Kosaka (Saneikai Tsukazaki Hospital), Yutaka Naka (Saiseikai Wakayama Hospital), Sanami Kawada (Okayama Kyokuto Hospital), Hideki Kiriyama (Okayama City Hospital), Katsuzo Kiya (Hiroshima Prefectural Hospital), Kazuhiko Kuroki (JA Hiroshima General Hospital), Shuuichi Oki (Araki Neurosurgical Hospital), Koichi Noda (National Hospital Organization Higashihiroshima Medical Center), Tsukasa Nishiura (National Hospital Organization Iwakuni Medical Center), Hideki Hondo (Tokushima Prefectural Central Hospital), Masanori Morimoto (Kochi Health Sciences Center), Yasunori Okabe (Izumino Hospital), Michio Aoki (Aoki Neurosurgery Plastic and Reconstructive Surgery), Takeshi Kono (Japanese Red Cross Kochi Hospital), Shigeru Fujimoto (Steel Memorial Yawata Hospital), Shuji Arakawa (Kyusyu Rosai Hospital), Kiyoshi Kazekawa (Fukuoka University Chikushi Hospital), Shigenari Kin (Medical Corporation Chiyukai Fukuoka Shinmizumaki Hospital), Yoshinori Go (Iryohojin Kouchiku-kai Go Neurosurgical Clinic), Iwae Yu (Fukuoka Kieikai Hsopital), Keiichiro Takase (Aso Iizuka Hospital), Shingo Yamashita (Medical Corporation Chiyukai Shin Yukuhashi Hospital), Tsutomu Hitotsumatsu (Shin Koga Hospital), Tadashi Terasaki (Japanese Red Cross Kumamoto Hospital), Akira Satoh (Nagasaki Kita Hospital).

**Supplemental Methods**

***Bleeding events***

Bleeding events were defined as follows.

1. Life-threatening bleeding: fatal bleeding, bleeding with decrease in hemoglobin ≥5 g/dL, bleeding with depression of blood pressure requiring blood pressure elevation with a cardiotonic, symptomatic intracranial bleeding, bleeding requiring erythrocyte transfusion of at least 8 units.
2. Major bleeding: bleeding leading to major dysfunction, intraocular bleeding leading to marked vision loss, bleeding requiring erythrocyte transfusion of less than 8 units.
3. Clinically relevant hemorrhage: bleeding in an important part, gastrointestinal bleeding with hemoglobin decrease, macrohematuria not due to external factors, bleeding requiring otolaryngologic procedure, gingival bleeding requiring dental treatment, bleeding considered by the investigator or sub-investigator to require discontinuation or suspension of administration.
4. Other bleeding: any bleeding that does not come under life-threatening bleeding, major bleeding, or clinically relevant bleeding.

***Efficacy events***

Efficacy events were defined as follows.

1. Stroke: new neurological symptoms or signs discovered and lesions responsible for them observed in CT or MRI.
2. Cerebral infarction: new neurological symptoms or signs discovered and new infarcts associated with them observed in CT or MRI.
3. Myocardial infarction: definitive diagnosis based on findings including chest ischemia symptoms, elevated cardiac enzymes, and ECG results.
4. Death from other vascular causes: cause of death due to vessels other than cerebral vessels or cardiac vessels.
5. Cerebro-cardiovascular event-related death: cause of death due to cerebral or cardiac vessels.
6. Transient ischemic attack: transient episodes of neurological disorders due to local ischemia in the brain or spinal cord or retina, for which there are no findings for acute infarction in CT or MRI.
7. Unstable angina: definitive diagnosis based on findings including chest ischemia symptoms, elevated cardiac enzymes and ECG examinations and for which emergency revascularization was conducted.
8. Peripheral artery occlusion: condition for which internal medicine or surgical procedures have been conducted due to acute ischemia.

***Genotyping***

Star allele genotypes for the CYP2C19 gene were determined by the single-nucleotide polymorphism method. Genotyping of CYP2C19 single-nucleotide polymorphisms (SNPs; 19154G>A and 17948G>A) was performed using the Invader DNA assay method (Third Wave Technologies, Madison, WI, USA). Patients were classified into 3 groups according to the following genotypes and associated phenotypes: extensive metabolizer (EM; *1/*1), intermediate metabolizer (IM; *1/*2, *1/*3), and PM (*2/*2, *2/*3, *3/*3).

Supplemental Table 1.Incidence of primary safety events stratified by age and body weight*a*

|  | | | | | No. of patients, incidence (95% CI) | | | | | | Hazard ratio (95% CI) | |
| --- | --- | --- | --- | --- | --- | --- | --- | --- | --- | --- | --- | --- |
| PRA3.75  (n = 216) | | PRA2.5  (n = 215) | | CLO50  (n = 223) | | PRA3.75/CLO50 | PRA2.5/CLO50 |
| **Primary safety events** | | | | | | |  |  |  |  |  |  |
|  | ≥75 years and >50 kg | | 6/131 | | | 4.6%  (1.7%, 9.7%) | 3/141 | 2.1%  (0.4%, 6.1%) | 7/136 | 5.1%  (2.1%, 10.3%) | 0.86  (0.29, 2.56) | 0.41  (0.11, 1.58) |
|  | ≤50 kg | | 3/85 | | | 3.5%  (0.7%, 10.0%) | 1/74 | 1.4%  (0.0%, 7.3%) | 1/87 | 1.1%  (0.0%, 6.2%) | 3.02  (0.31, 29.01) | 1.14  (0.07, 18.20) |
|  | <75 years and ≤50 kg | | 3/44 | | | 6.8%  (1.4%, 18.7%) | 1/36 | 2.8%  (0.1%, 14.5%) | 0/52 | 0.0%  (0.0%, 6.8%) | ― | ― |
|  | ≥75 years and ≤50 kg | | 0/41 | | | 0.0%  (0.0%, 8.6%) | 0/38 | 0.0%  (0.0%, 9.3%) | 1/35 | 2.9%  (0.1%, 14.9%) | 0.00  (0.00, ―) | 0.00  (0.00, ―) |
|  | ***Life-threatening bleeding*** | | | | | |  |  |  |  |  |  |
|  |  | ≥75 years and >50 kg | | 1/131 | | 0.8%  (0.0%, 4.2%) | 0/141 | 0.0%  (0.0%, 2.6%) | 0/136 | 0.0%  (0.0%, 2.7%) | ― | ― |
|  |  | ≤50 kg | | 2/85 | | 2.4%  (0.3%, 8.2%) | 1/74 | 1.4%  (0.0%, 7.3%) | 0/87 | 0.0%  (0.0%, 4.2%) | ― | ― |
|  |  | <75 years and ≤50 kg | | 2/44 | | 4.5%  (0.6%, 15.5%) | 1/36 | 2.8%  (0.1%, 14.5%) | 0/52 | 0.0%  (0.0%, 6.8%) | ― | ― |
|  |  | ≥75 years and ≤50 kg | | 0/41 | | 0.0%  (0.0%, 8.6%) | 0/38 | 0.0%  (0.0%, 9.3%) | 0/35 | 0.0%  (0.0%, 10.0%) | ― | ― |
|  | ***Major bleeding*** | | |  | |  |  |  |  |  |  |  |
|  |  | ≥75 years and >50 kg | | 0/131 | | 0.0%  (0.0%, 2.8%) | 1/141 | 0.7%  (0.0%, 3.9%) | 0/136 | 0.0%  (0.0%, 2.7%) | ― | ― |
|  |  | ≤50 kg | | 0/85 | | 0.0%  (0.0%, 4.2%) | 0/74 | 0.0%  (0.0%, 4.9%) | 0/87 | 0.0%  (0.0%, 4.2%) | ― | ― |
|  |  | <75 years and ≤50 kg | | 0/44 | | 0.0%  (0.0%, 8.0%) | 0/36 | 0.0%  (0.0%, 9.7%) | 0/52 | 0.0%  (0.0%, 6.8%) | ― | ― |
|  |  | ≥75 years and ≤50 kg | | 0/41 | | 0.0%  (0.0%, 8.6%) | 0/38 | 0.0%  (0.0%, 9.3%) | 0/35 | 0.0%  (0.0%, 10.0%) | ― | ― |
|  | ***Other clinically relevant bleeding*** | | | | | |  |  |  |  |  |  |
|  |  | ≥75 years and >50 kg | | 5/131 | | 3.8%  (1.3%, 8.7%) | 2/141 | 1.4%  (0.2%, 5.0%) | 7/136 | 5.1%  (2.1%, 10.3%) | 0.72  (0.23, 2.27) | 0.27  (0.06, 1.32) |
|  |  | ≤50 kg | | 1/85 | | 1.2%  (0.0%, 6.4%) | 0/74 | 0.0%  (0.0%, 4.9%) | 1/87 | 1.1%  (0.0%, 6.2%) | 1.01  (0.06, 16.18) | 0.00  (0.00, ―) |
|  |  | <75 years and ≤50 kg | | 1/44 | | 2.3%  (0.1%, 12.0%) | 0/36 | 0.0%  (0.0%, 9.7%) | 0/52 | 0.0%  (0.0%, 6.8%) | ― | ― |
|  |  | ≥75 years and ≤50 kg | | 0/41 | | 0.0%  (0.0%, 8.6%) | 0/38 | 0.0%  (0.0%, 9.3%) | 1/35 | 2.9%  (0.1%, 14.9%) | 0.00  (0.00, ―) | 0.00  (0.00, ―) |

CI, confidence interval; PRA3.75, prasugrel 3.75 mg; PRA2.5, prasugrel 2.5 mg; CLO50, clopidogrel 50 mg.

*a*No significant difference was found for any of the comparisons.

Supplemental Table 2. Adverse events*a*

|  | No. of patients, % | | | | | |
| --- | --- | --- | --- | --- | --- | --- |
| PRA3.75  (n = 216) | | PRA2.5  (n = 215) | | CLO50  (n = 223) | |
| AEs | 180 | 83.3% | 180 | 83.7% | 190 | 85.2% |
| Drug-related AEs | 66 | 30.6% | 48 | 22.3% | 55 | 24.7% |
| Serious AEs | 35 | 16.2% | 36 | 16.7% | 36 | 16.1% |
| Death | 0 | 0.0% | 1 | 0.5% | 0 | 0.0% |
| Serious AEs other than death | 35 | 16.2% | 36 | 16.7% | 36 | 16.1% |
| Drug-related serious AEs other than death | 8 | 3.7% | 6 | 2.8% | 7 | 3.1% |
| Death | 0 | 0.0% | 0 | 0.0% | 0 | 0.0% |
| Serious AEs other than death | 8 | 3.7% | 6 | 2.8% | 7 | 3.1% |
| Severe AEs | 6 | 2.8% | 13 | 6.0% | 14 | 6.3% |
| Drug-related severe AEs | 1 | 0.5% | 5 | 2.3% | 2 | 0.9% |
| AEs leading to treatment discontinuation | 16 | 7.4% | 23 | 10.7% | 30 | 13.5% |
| Drug-related AEs leading to treatment discontinuation | 6 | 2.8% | 8 | 3.7% | 15 | 6.7% |
| AEs associated with liver function | 11 | 5.1% | 10 | 4.7% | 15 | 6.7% |
| Drug-related AEs associated with liver function | 3 | 1.4% | 5 | 2.3% | 9 | 4.0% |
| Severe AEs associated with liver function | 0 | 0.0% | 0 | 0.0% | 1 | 0.4% |
| Drug-related severe AEs associated with liver function | 0 | 0.0% | 0 | 0.0% | 0 | 0.0% |

AEs, adverse events; PRA3.75, prasugrel 3.75 mg; PRA2.5, prasugrel 2.5 mg; CLO50, clopidogrel 50 mg.

*a*No significant difference was found for any of the comparisons.
