# Supplementary material
Source: publisher figshare collection journal article supplement (https://karger.figshare.com/articles/dataset/_/12022737)

**Supplemental Fig. 1.** Progress of patients in the PRASTRO-II trial.

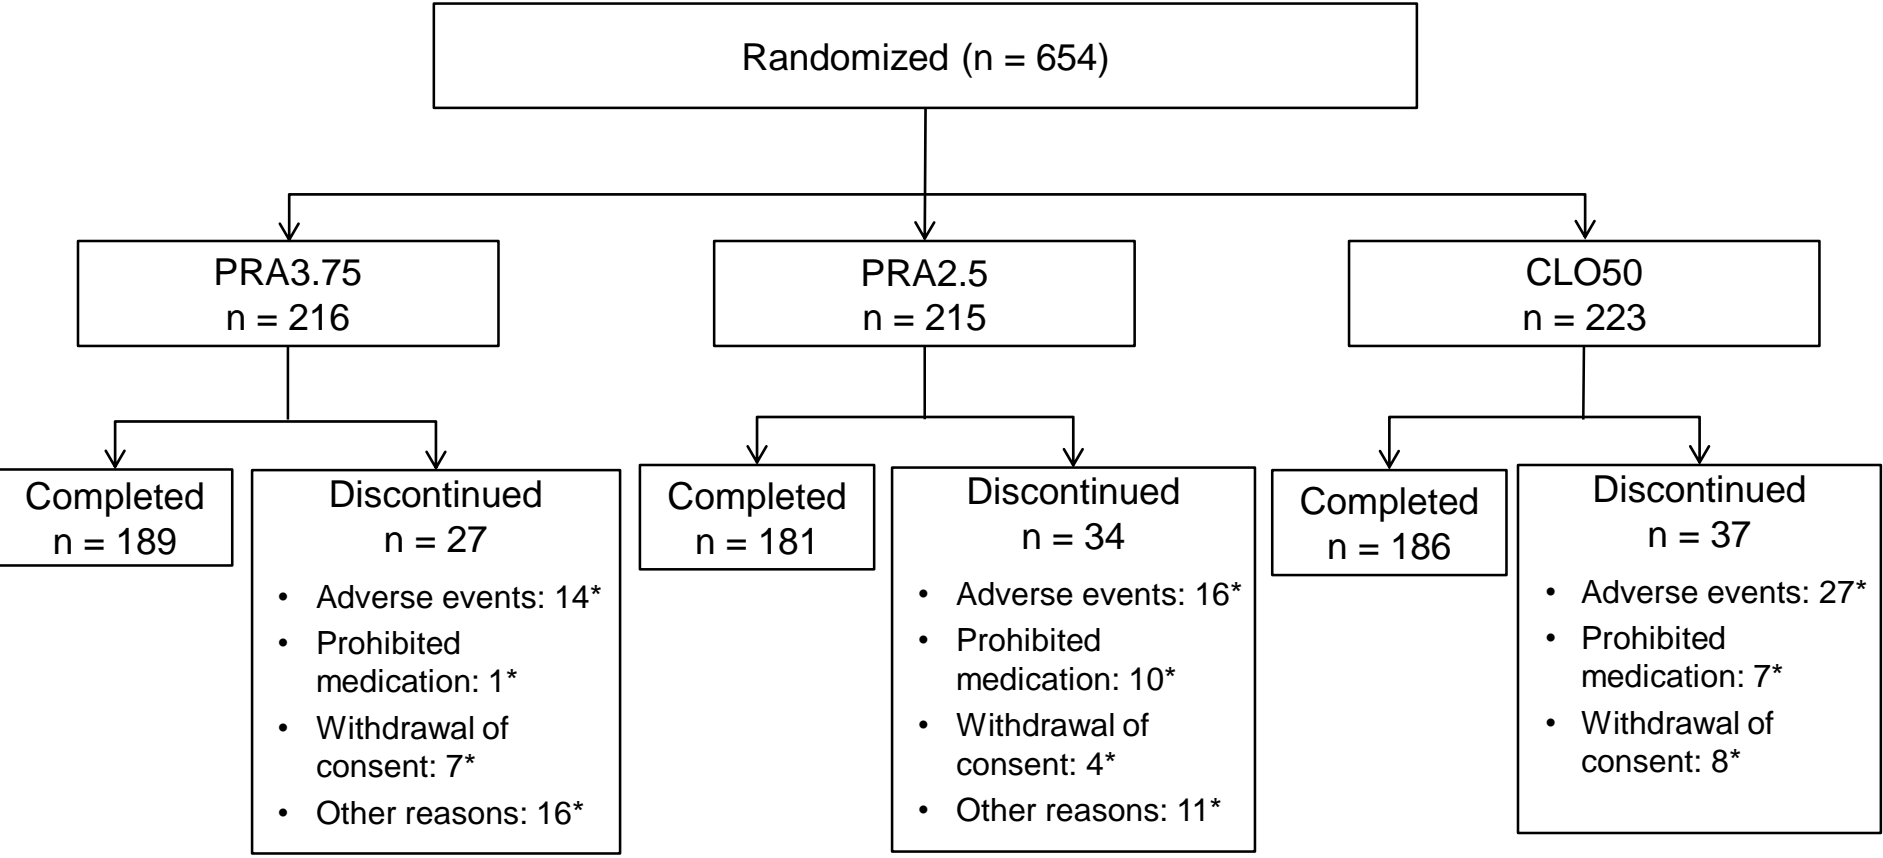

\*Numbers may include duplicate counts

**Supplemental Fig. 2A.** Changes in P2Y12 reaction unit (PRU) values over the study period.

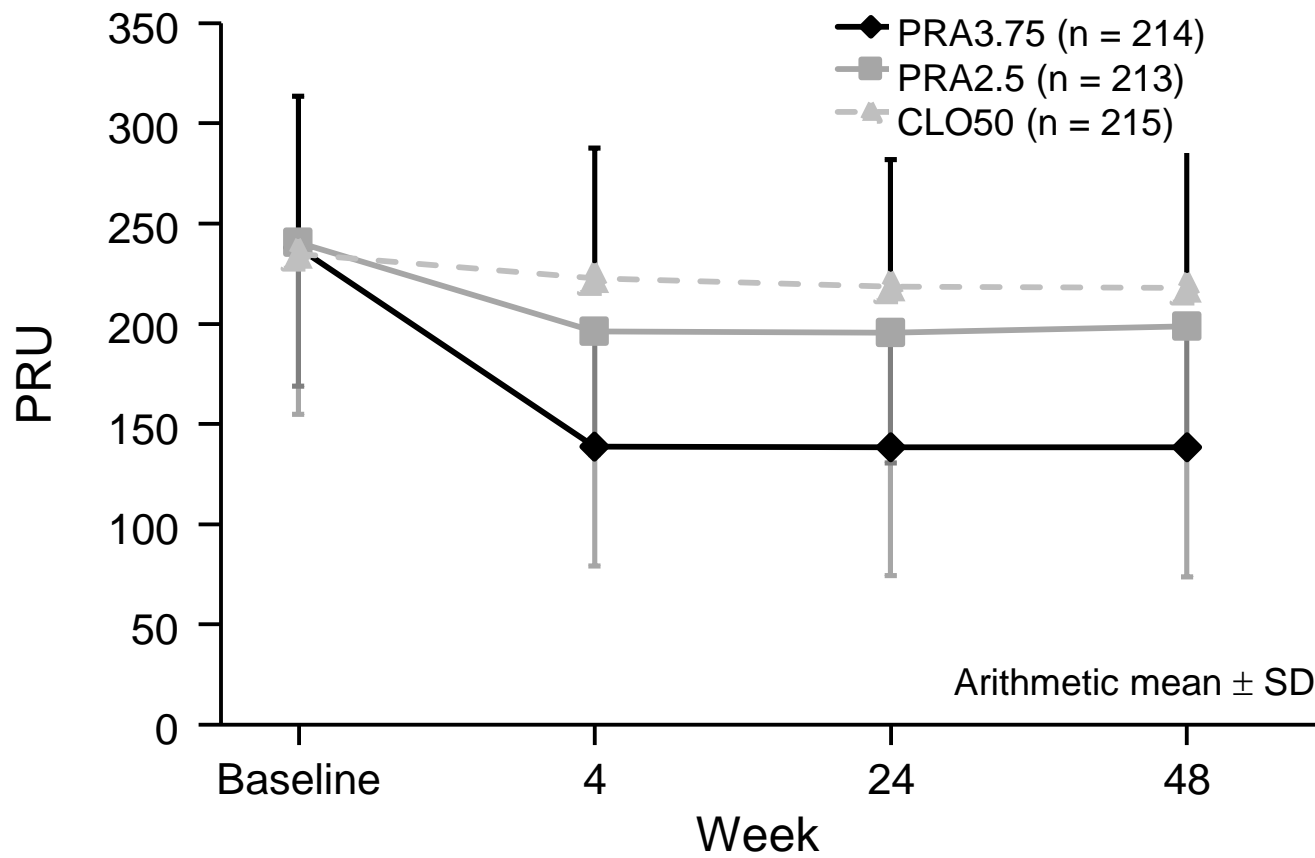

**Supplemental Fig. 2B.** P2Y12 reaction unit (PRU) values at week 4, according to CYP2C19 phenotype. ○●□, Arithmetic mean; +, values between 1.5\*IQR and 3\*IQR from UQ/LQ; IQR, interquartile range; UQ, 75th percentile; LQ, 25th percentile; PRA3.75, prasugrel 3.75 mg; PRA2.5, prasugrel 2.5 mg; CLO50, clopidogrel 50 mg.

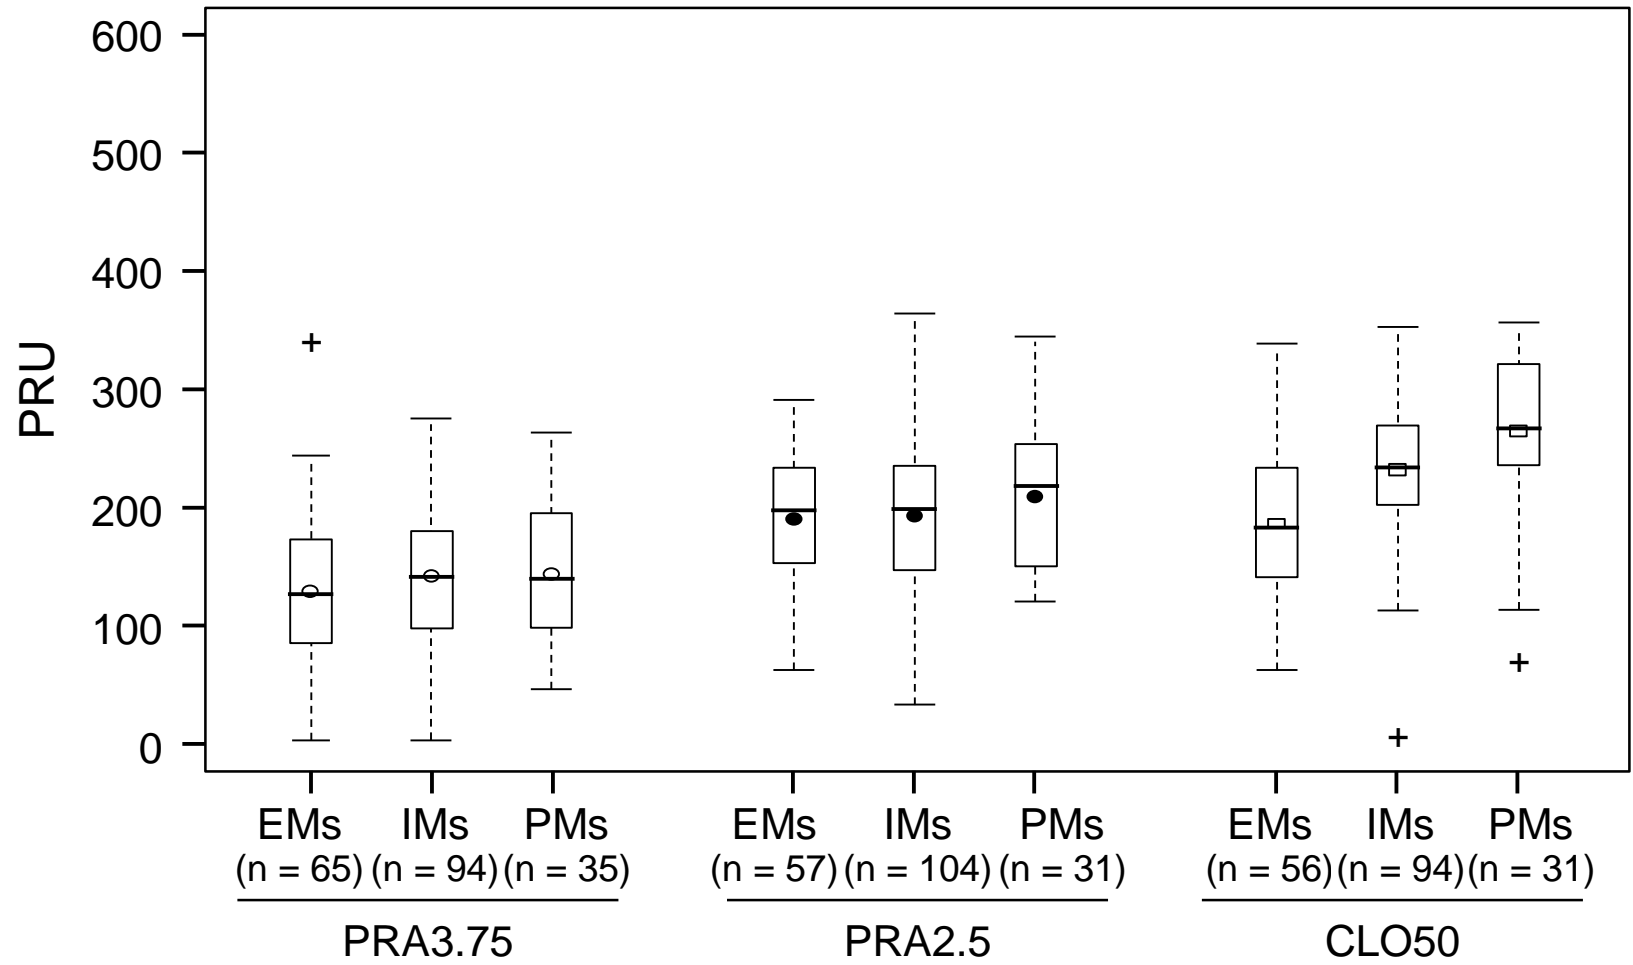

Supplement: Supplementary file 1 [file 1 › 506825_sm2.pdf]
